# Supplementary material for: Comprehensive overview of the anesthesiology research landscape: A machine Learning Analysis of 737 NIH-funded anesthesiology primary Investigator's publication trends
Source: PubMed Central journal article supplement (PMC11016610; doi:10.1016/j.heliyon.2024.e29050), 2024-04-03

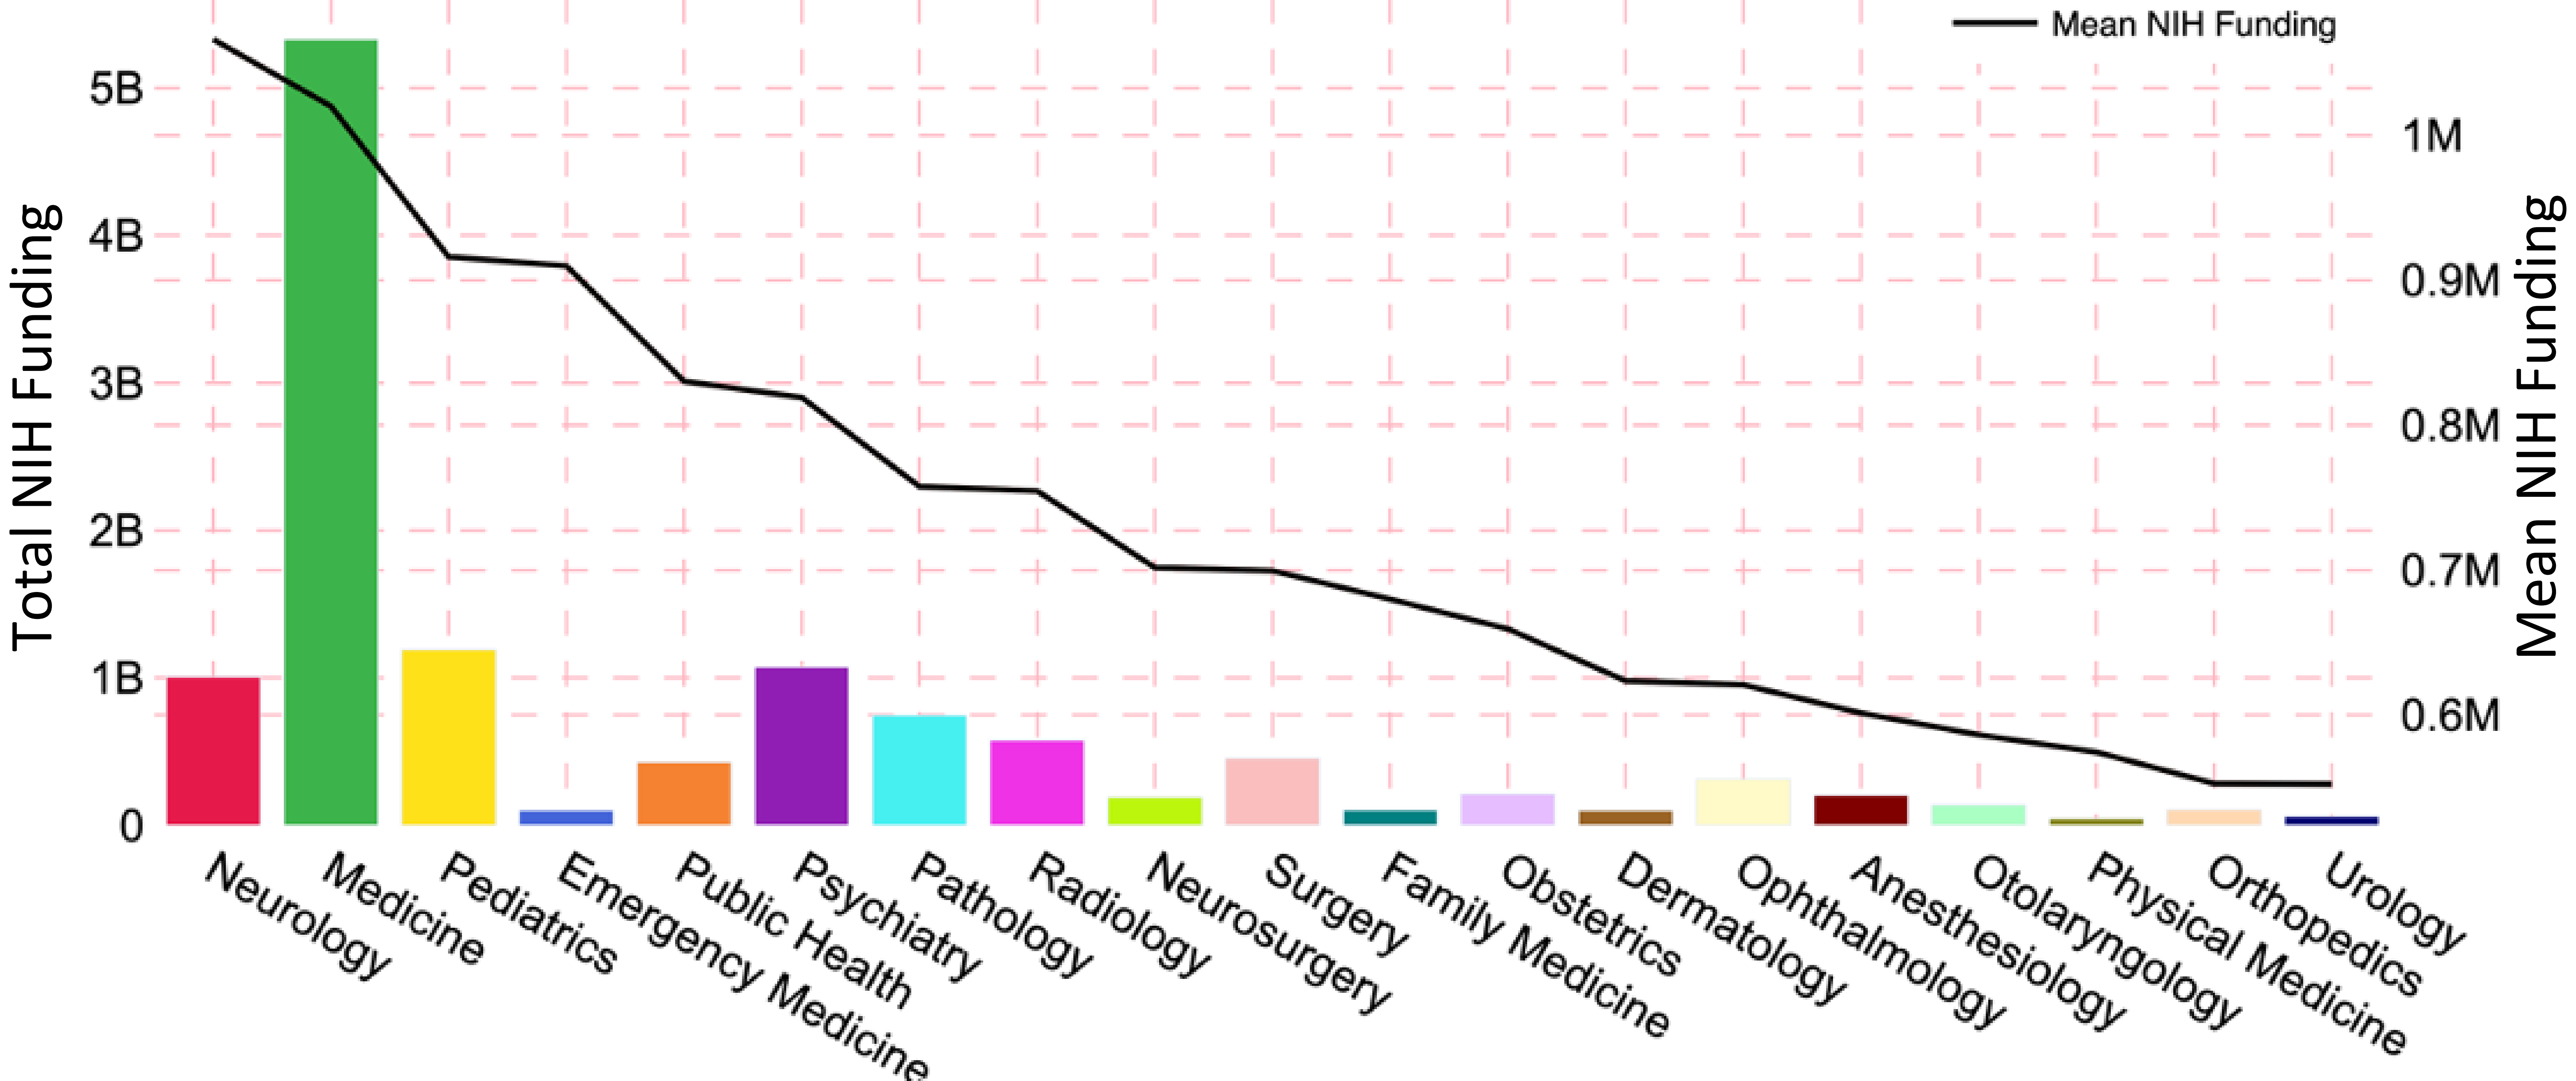

Supplement: mmc1.pdf [file mmc1.pdf]
